# Supplementary material
Source: PubMed Central journal article supplement (PMC8814977)
Supplement: jamaophthalmol-e216067-s003.pdf [file jamaophthalmol-e216067-s003.pdf]

## Supplementary Online Content

Nittala MG, Metlapally R, Ip M, et al. Association of pegcetacoplan with progression of incomplete retinal pigment epithelium and outer retinal atrophy in age-related macular degeneration: a post hoc analysis of the FILLY randomized clinical trial. *JAMA Ophthalmol*. Published online February 3, 2022.  
doi:10.1001/jamaophthalmol.2021.6067

### **eTable.** Characteristics of Eyes With iRORA at Baseline

This supplementary material has been provided by the authors to give readers additional information about their work.

**eTable.** Characteristics of Eyes With iRORA at Baseline

|                                            | Pegcetacoplan Monthly<br>(n=18) | Pegcetacoplan Every<br>Other Month<br>(n=34) | Sham Injections<br>(n=34) |
|--------------------------------------------|---------------------------------|----------------------------------------------|---------------------------|
| GA lesion size, mean, mm <sup>2</sup> (SD) | 8.27 (4.49)                     | 7.43 (4.13)                                  | 8.13 (4.03)               |
| Lesion location, n (%)                     |                                 |                                              |                           |
| • Subfoveal                                | 13 (72%)                        | 22 (65%)                                     | 20 (59%)                  |
| • Nonsubfoveal                             | 5 (28%)                         | 12 (35%)                                     | 14 (41%)                  |
| Lesion focality, n (%)                     |                                 |                                              |                           |
| • Unifocal                                 | 5 (28%)                         | 10 (29%)                                     | 6 (18%)                   |
| • Multifocal                               | 13 (72%)                        | 24 (71%)                                     | 28 (82%)                  |
| Presence of >5 iRORA lesions               | 0 (0%)                          | 10 (29%)                                     | 3 (9%)                    |
