# Supplementary material
Source: PubMed Central journal article supplement (PMC8814977)
Supplement: jamaophthalmol-e216067-s004.pdf [file jamaophthalmol-e216067-s004.pdf]

## Data Sharing Statement

Nittala. Association of Pegcetacoplan With Progression of Incomplete Retinal Pigment Epithelial and Outer Retinal Atrophy in Age-Related Macular Degeneration. *JAMA Ophthalmol.* Published February 03, 2022. doi:10.1001/jamaophthalmol.2021.6067

### Data

**Data available:** No
